# Supplementary material for: Designed 3D heterostructure with 0D/1D/2D hierarchy for low-frequency microwave absorption in the S-band
Source: Royal Society of Chemistry journal article supplement (doi:10.1039/d1tc04881c), 2021-12-23
Supplement: d1tc04881c1.pdf [file d1tc04881c1.pdf]

## Supporting Information

### **Designed 3D heterostructure by 0D/1D/2D hierarchy for low-frequency microwave absorption in the S-band**

Jun Zhou, Fan Guo, Jialiang Luo, Gazi Hao, Guigao Liu, Yubing Hu, Guangpu Zhang,

Hu Guo, Hao Zhou\*, Wei Jiang\*

National Special Superfine Powder Engineering Technology Research Center,  
Nanjing University of Science and Technology, Nanjing 210094, Jiangsu, China

\*Corresponding author: [hao.zhou@njust.edu.cn](mailto:hao.zhou@njust.edu.cn) (Hao Zhou) and [climentjw@126.com](mailto:climentjw@126.com)

(Wei Jiang)

## Experimental

### *Synthesis of ZIF-67*

Typically, 6 mmol  $\text{Co}(\text{NO}_3)_2 \cdot 6\text{H}_2\text{O}$  and 24 mmol 2-methylimidazole were dissolved in 50 mL methanol, respectively. Secondly, the 2-methylimidazole solution was quickly added to the  $\text{Co}^{2+}$  solution, and the solution was stirred for 10 minutes. Thirdly, the above mixture was aged at  $20^\circ\text{C}$  for 24h. Finally, the precipitate was washed three times by absolute ethanol, and dried under vacuum at  $60^\circ\text{C}$  for 12h.

### *Synthesis of Co-Ni LDH*

Firstly, 80 mg of as-prepared ZIF-67 was dissolved in methanol solution (80 mL). Herein, 160 mg  $\text{Ni}(\text{NO}_3)_2 \cdot 6\text{H}_2\text{O}$  was contained in methanol solution. Secondly, the solution was continuously stirred for 1h at room temperature. Finally, the product was collected by centrifugation and washed, and dried under vacuum at  $60^\circ\text{C}$  for 12 h.

### *Synthesis of CoNi/N-CNT*

Representatively, 100 mg Co-Ni LDH and 1.0 g dicyandiamide (DCTA) were placed in two separate ceramic boats with DCDA at the upstream side of the furnace in a  $\text{N}_2$  atmosphere. Then, the boat was kept at  $430^\circ\text{C}$  for 8 h in the first stage, and then continue maintained at  $700^\circ\text{C}$  for another 2h at a heating rate of  $5^\circ\text{C}/\text{min}$ .

### *Synthesis of $\text{Ti}_3\text{C}_2\text{T}_x$ MXene*

Typically, 2g LiF was added to 40 mL of 9M HCl solution under stirring for 2h at  $40^\circ\text{C}$ . Secondly, 1g  $\text{Ti}_3\text{AlC}_2$  was slowly added to the above solution. Thirdly, the mixed solution was stirred at  $40^\circ\text{C}$  for 32h. Fourthly, the precipitate after the reaction was collected by centrifugation and washed with deionized water until the  $\text{pH}=6$  or so.

Fifthly, the mixed solution was sonicated for 1.5h in an ultrasonic instrument with ice packs. Then, the above solution was centrifuged at 3500 rpm for 30 min. Finally, the product was collected by suction filtration and freeze-dried.

#### *Synthesis of $Ti_3C_2T_x$ MXene/ CoNi/N-CNT 3D superstructure nanocomposites*

Firstly, configure the MXene aqueous solution. Specifically, 40 mg MXene was dissolved in deionized water (80 mL). Secondly, the MXene aqueous solution was sonicated for 30 minutes and stirred for 15 minutes, respectively. Thirdly, 80 mg CoNi/N-CNT were added to the CTAB solution ( $1 \text{ mg mL}^{-1}$ ) and further immersed in MXene solution. After this, the mixed solution were sonicated and stirred for 30 and 15 min, respectively. Importantly, the whole process is carried out in  $N_2$  atmosphere. Finally, the product is obtained by suction filtration and freeze-dried.

#### *Characterization*

The phase of the sample was analyzed by XRD (Bruker D8 Advance, Germany) at  $5\text{-}80^\circ$ . Raman spectra were obtained using a Raman spectrometer (LabRAM HR Evolution, HORIBA JobinYvon, France) at room temperature using the 532 nm line as the excitation source. XPS measurements were carried out on an ESCALAB 250Xi spectrometer (Thermo Scientific, USA) equipped with a pass energy of 30 eV with a power of 100 W (10 kV and 10 mA). The microstructure was observed and analyzed by FESEM (FEI Quanta 400Feg, USA), TEM and HRTEM (JEM 2100F, Japan). The adsorption-desorption isotherm is obtained by the specific surface area analyzer (Micromeritics ASAP 2460, USA). Magnetization was measured by using a vibrating sample magnetometer (Quantum Design Lakeshore7404, USA) at room temperature.

**The Zeta-potentials in deionized water of the samples were measured with a Malvern zeta analyzer (Zetasizer Nano, Malvern Instrument, UK).**

*Electromagnetic parameters*

**The absorption parameters of the sample were obtained by the network analyzer (AV3672B-S, China) at the frequency (2-18 GHz). The sample preparation is divided into three steps. First, evenly mix the sample with molten paraffin. To obtain the samples for microwave measurement, the powders were uniformly mixed with molten paraffin, with a paraffin-powder mass ratio of 7:3. Then, natural curing. Finally, the mixtures were pressed into a cylindrical shape with a mold, with an inner diameter of 3.04 mm, an outer diameter of 7 mm and thicknesses of 2-3 mm.**

## Results and Discussion

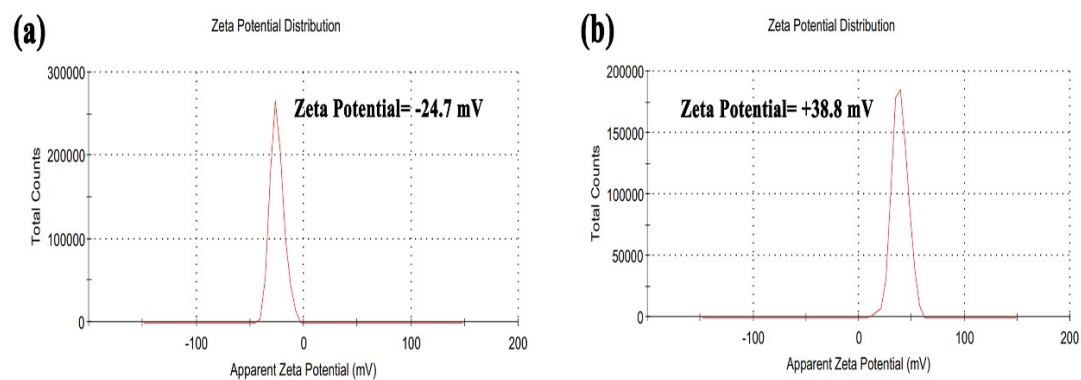

**Fig. S1.** Zeta potential of MXene aqueous solution (a) and (b) CoNi/N-CNTs modified by CTAB.

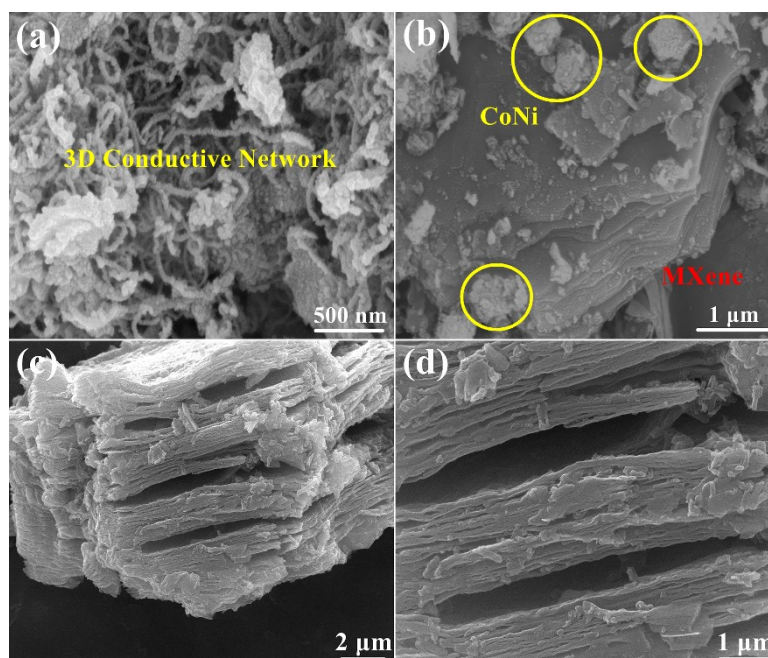

**Fig. S2.** FESEM images with different magnifications of samples: (a-b) S1 and (c-d) Ti<sub>3</sub>C<sub>2</sub>T<sub>x</sub>.

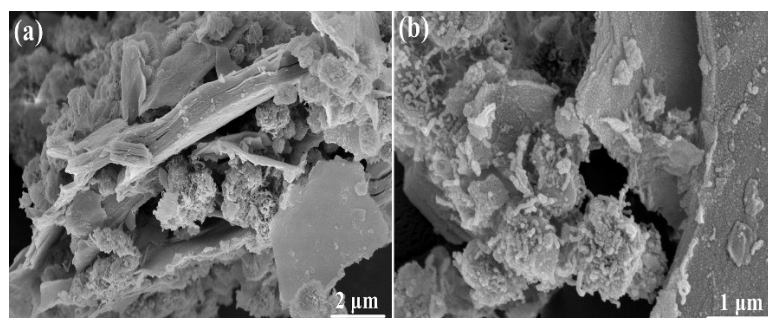

**Fig. S3.** FESEM images with different magnifications of samples: (a-b) S2 and (c-d) S3.

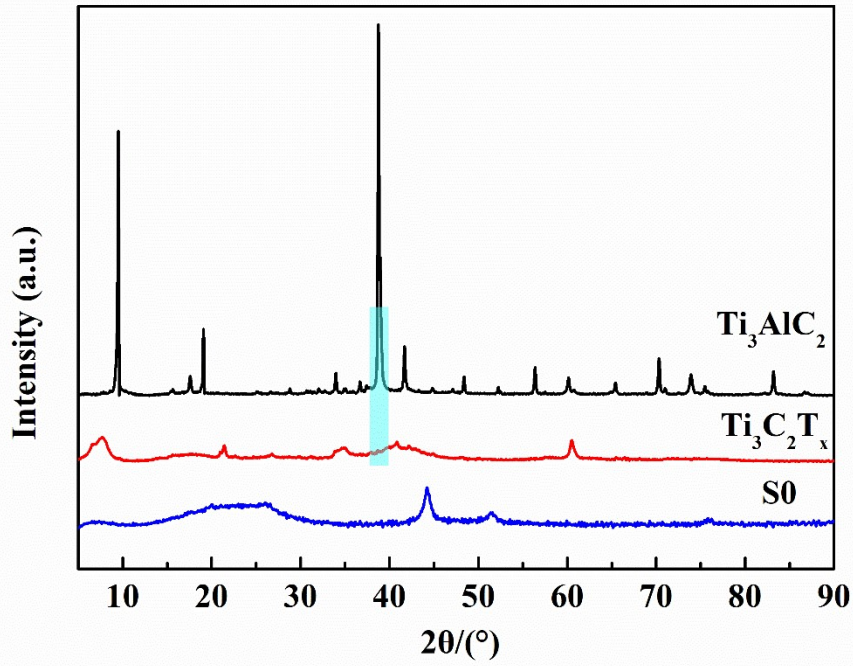

Fig. S4. XRD patterns of samples.

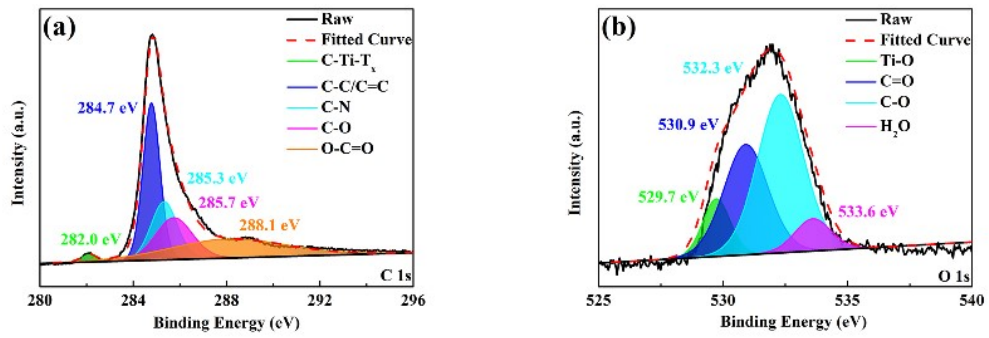

Fig. S5. XPS spectra of (a) C 1s and (b) O 1s.

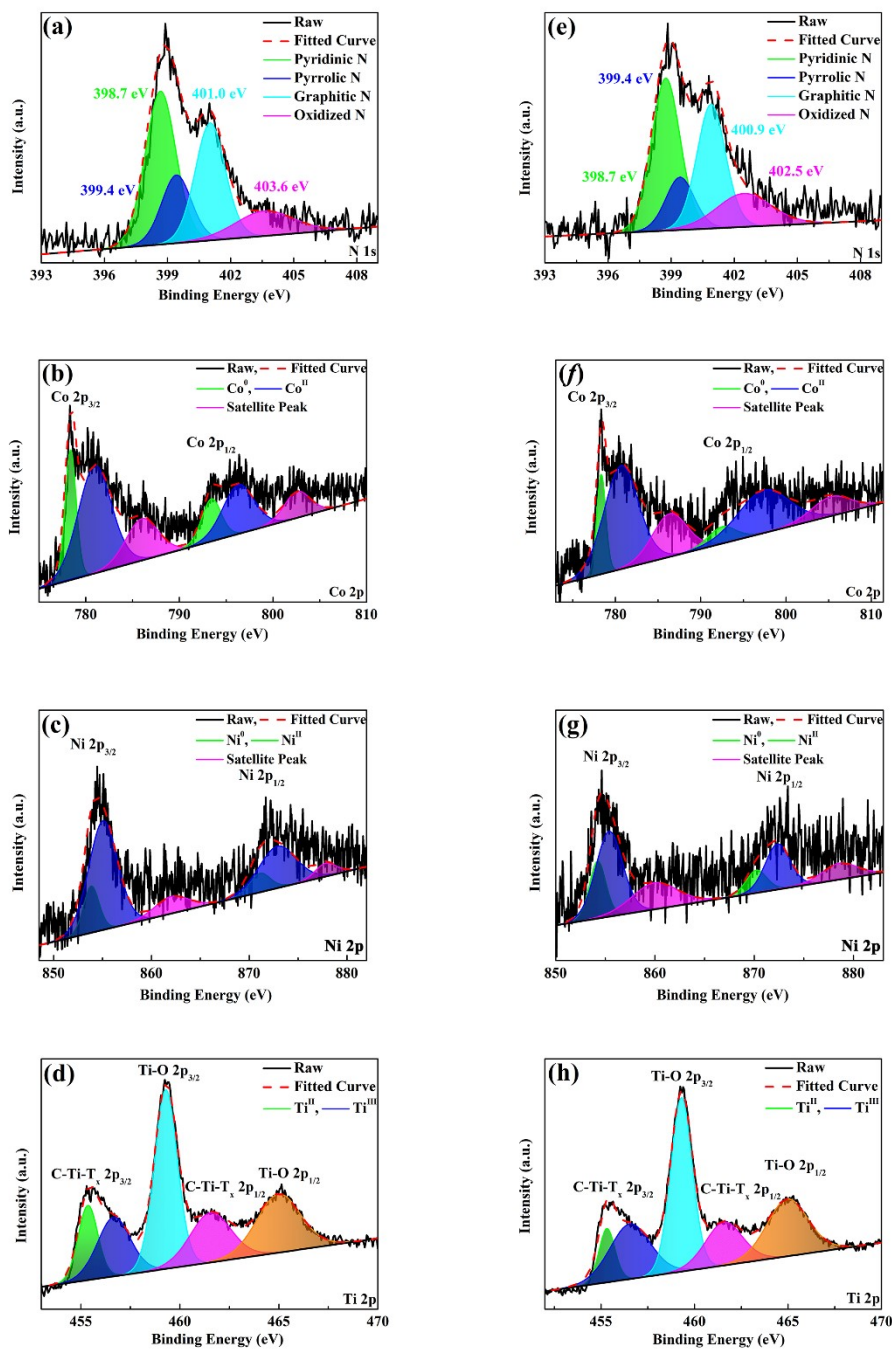

**Fig. S6.** XPS spectra of N 1s, Co 2p, Ni 2p and Ti 2p of S2 (a-d) and S3 (e-h).

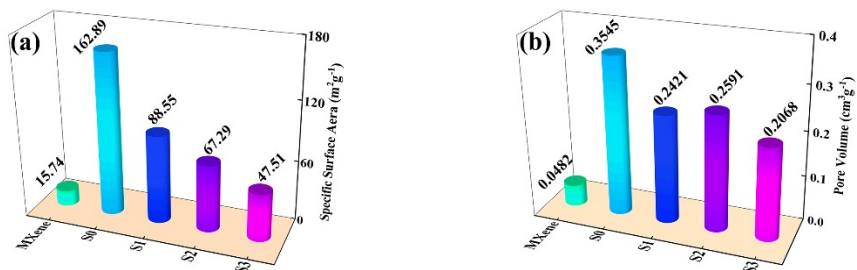

Fig. S7. The specific surface area (a) and pore volume (b) of the as-prepared samples.

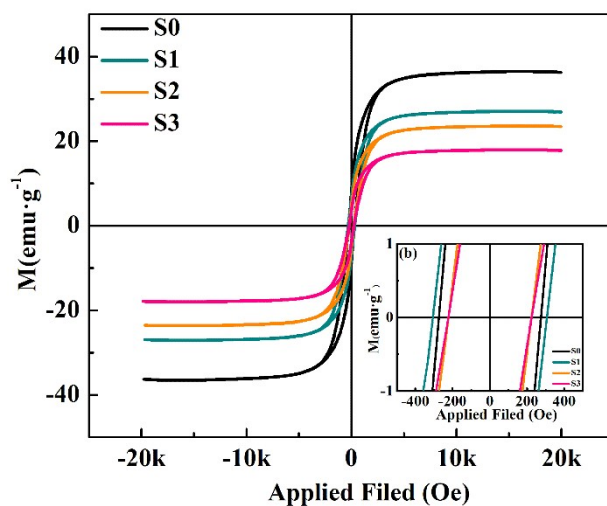

Fig. S8. Hysteresis loops of the samples, with the insets showing enlarged view.

Table S1 Magnetic parameters of the samples.

| Samples    | S0     | S1     | S2     | S3     |
|------------|--------|--------|--------|--------|
| Ms (emu/g) | 36.36  | 26.95  | 23.47  | 17.83  |
| Mr (emu/g) | 8.46   | 7.09   | 4.90   | 3.75   |
| Hc (Oe)    | 283.07 | 311.96 | 230.53 | 227.41 |



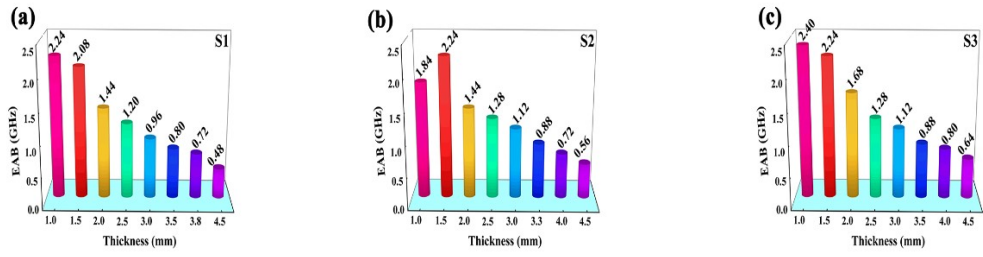

**Fig. S9.** Effective absorption bandwidth for samples: (a) S1, (b) S2 and (c) S3.

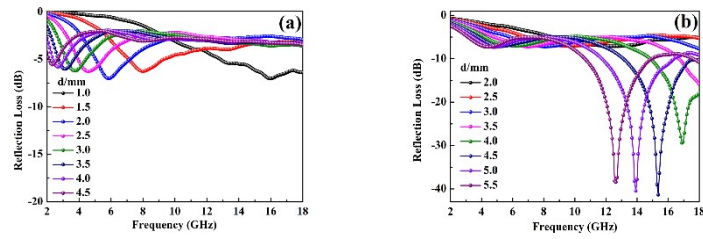

**Fig. S10.** Reflection loss curves of the samples at different thicknesses: (a) MXene and (b) S0.

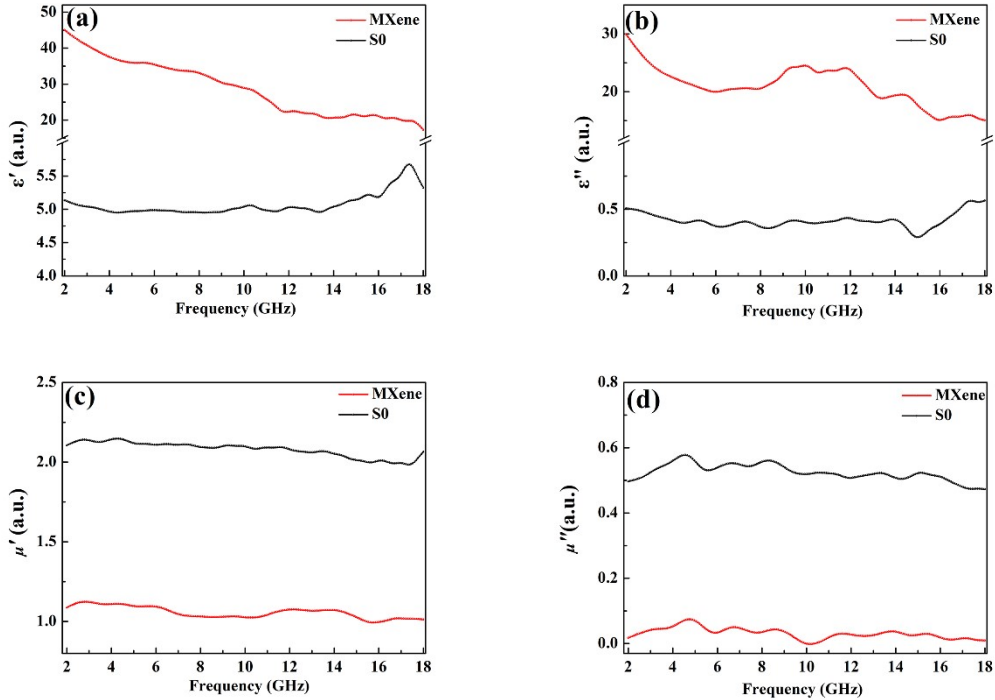

**Fig. S11.** Frequency dependence of (a) real permittivity ( $\epsilon'$ ), (b) imaginary permittivity ( $\epsilon''$ ), (c) real permeability ( $\mu'$ ) and (d) imaginary permeability ( $\mu''$ ).

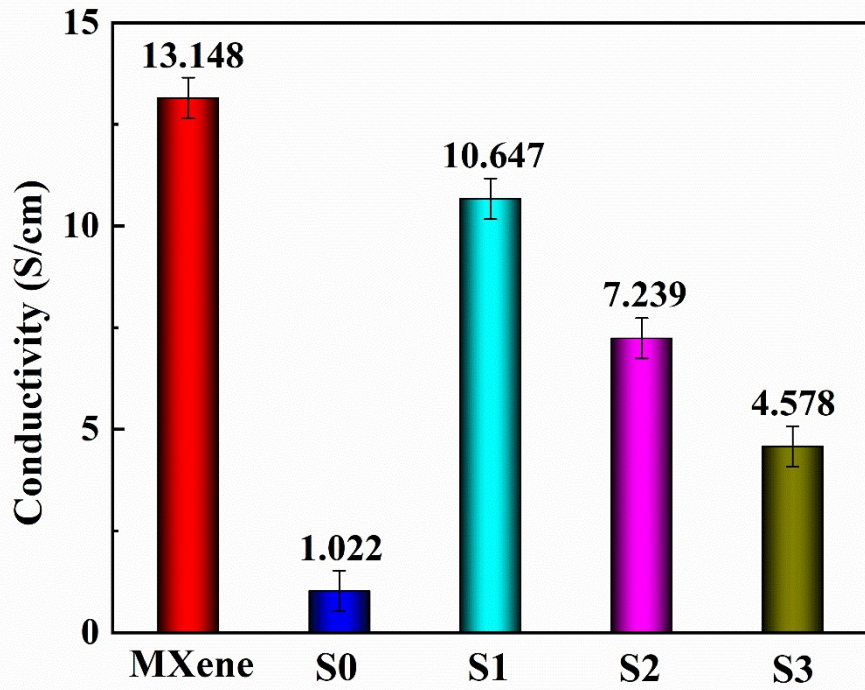

Fig. S12. (a) Statistics of electrical conductivity for different sample.

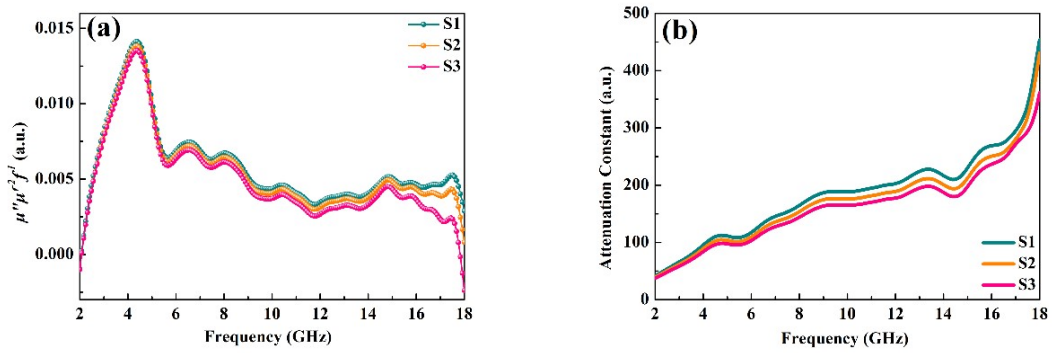

Fig. S13. (a) Plots of  $f^1(\mu')^{-2}\mu''$  and (b) attenuation constant  $\alpha$  of the samples.

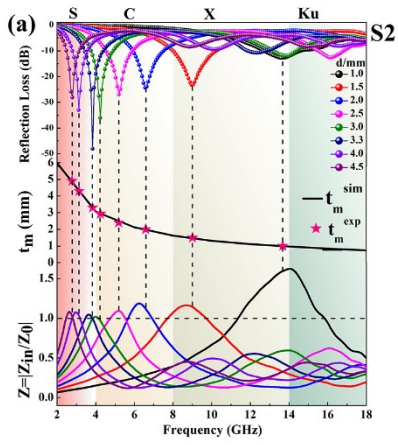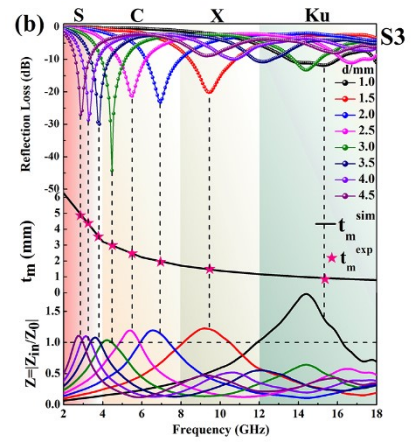

**Fig. S14.** Dependence of RL on frequency at  $1/4\lambda$  thicknesses and the Z for the sample: (a) S2 and (S3).
